# Supplementary material
Source: PubMed Central journal article supplement (PMC6440478)
Supplement: NIHMS974858-supplement-Figure_1.pdf [file NIHMS974858-supplement-Figure_1.pdf]

*a* Specific Fruits and Overall Breast Cancer

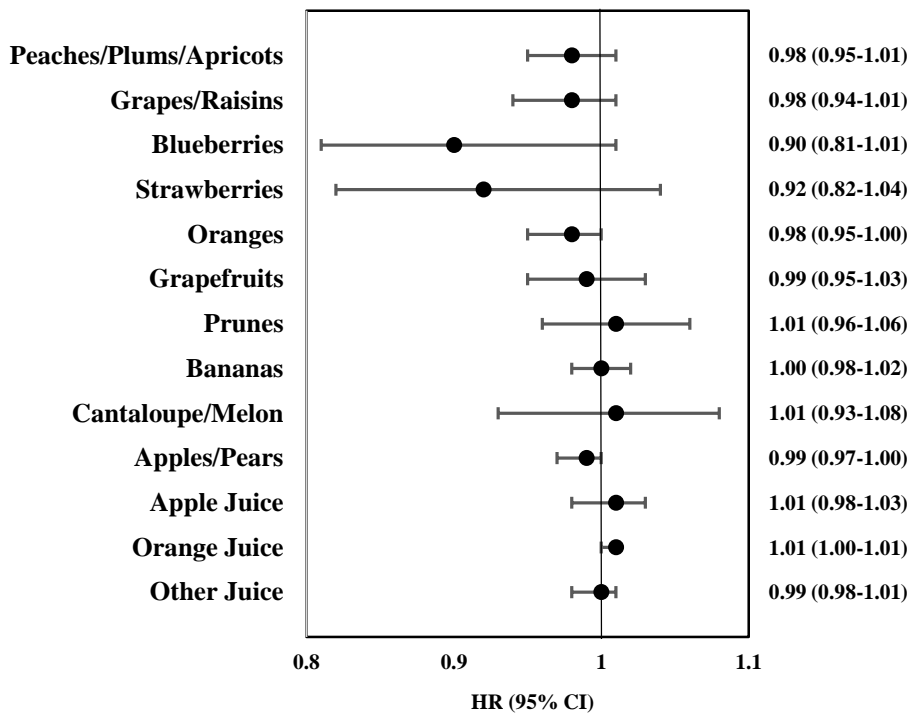

*b* Specific Vegetables and Overall Breast Cancer

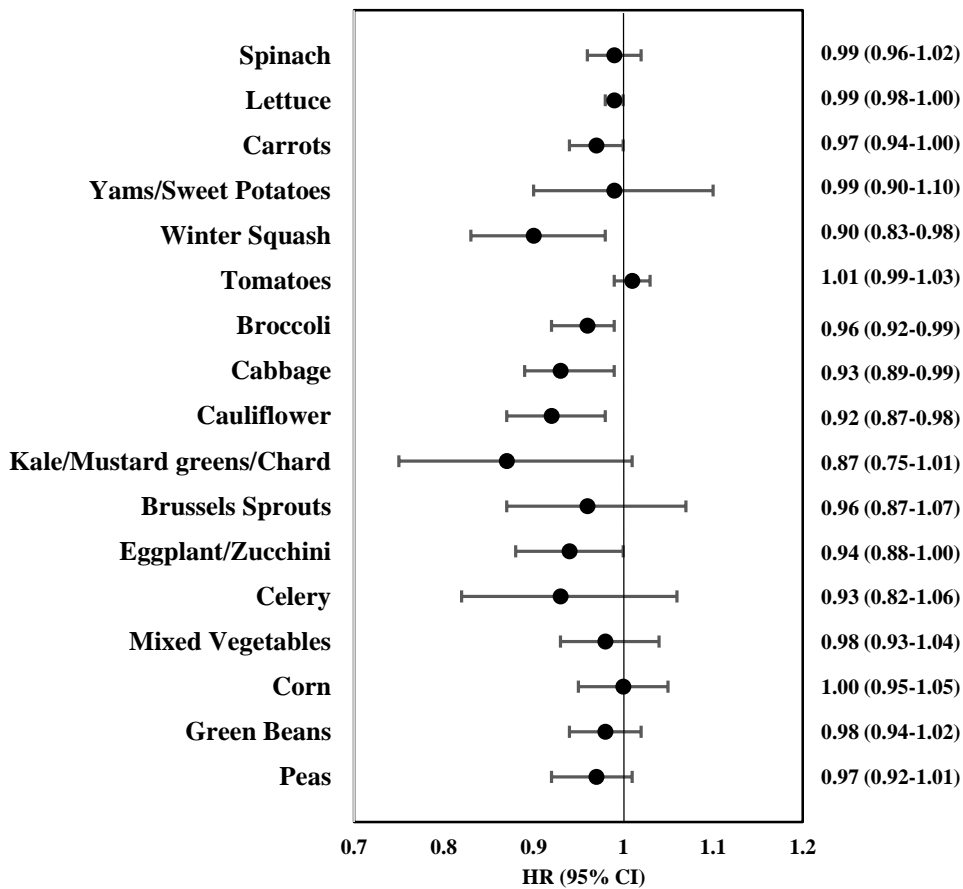

**Figure S1.** Multivariable hazard ratios and 95% confidence intervals for every 2 servings/week of specific fruits (*a*) and vegetables (*b*) in relation to incidence of total breast cancer (10,911 cases) among 182,145 women in the Nurses' Health Studies
