# Supplementary material
Source: PubMed Central journal article supplement (PMC6440478)
Supplement: NIHMS974858-supplement-Tables.pdf [file NIHMS974858-supplement-Tables.pdf]

**Table S1: Definitions for various fruit and vegetable subgroups based on individual items in the SFFQs**

| <b>Sub-groups</b>                         | <b>Individual foods</b>                                                                                                                                                                                                                                                                                                                                                                                                                                                                                                                                                                                                                                                                                                                                                                                                  |
|-------------------------------------------|--------------------------------------------------------------------------------------------------------------------------------------------------------------------------------------------------------------------------------------------------------------------------------------------------------------------------------------------------------------------------------------------------------------------------------------------------------------------------------------------------------------------------------------------------------------------------------------------------------------------------------------------------------------------------------------------------------------------------------------------------------------------------------------------------------------------------|
| Total Fruits                              | Grapes (1/2 cup)/raisins (2 tbsps.), prunes (1/2 cup), bananas (1 small), cantaloupe/melon (1 cup), apples/pears (1), oranges (1 small), grapefruit (1/2), strawberries (1 ¼ cup), blueberries (3/4 cup), peaches/plums/apricots (1/2 cup), watermelon(1 cup)*, apple sauce (1/2 cup)*                                                                                                                                                                                                                                                                                                                                                                                                                                                                                                                                   |
| Total juice                               | Apple juice/cider (1/2 cup), orange juice (1/2 cup), grapefruit juice (1/2 cup)*, other fruit juices (1/2 cup), prune juice (1/2 cup)*, tomatoe juice (1/2 cup)                                                                                                                                                                                                                                                                                                                                                                                                                                                                                                                                                                                                                                                          |
| Total vegetables                          | Raw spinach (1 cup), cooked spinach (1/2 cup), iceberg or head lettuce (1 cup), romaine or leaf lettuce (1 cup), raw carrots (1 large), cooked carrots (1/2 cup), yams/sweet potatoes (cooked, 1/2 cup), winter squash (dark orange squash) (cooked, 1/2 cup), tomatoes (1 medium), tomato sauce (1/3 cup), salsa (1/2 cup), broccoli (cooked, 1/2 cup), cabbage/Cole slaw (cooked, 1/2 cup), cauliflower (cooked, 1/2 cup), Brussels sprouts (cooked, 1/2 cup), kale/mustard greens/chard (cooked, 1/2 cup), corn (cooked, 1/2 cup), mixed vegetables (cooked, 1/2 cup), eggplant/zucchini/other summer squash (cooked, 1/2 cup), celery (1 cup), green pepper (1/2 cup)*, onion (1/2 cup)*, green beans (1/2 cup), peas (1/2 cup), mushroom*, beet (cooked, 1/2 cup)*, alfalfa sprouts (1 cup)*, sauerkraut (1/2 cup)* |
| Green leafy vegetables                    | Raw spinach, cooked spinach, iceberg or head lettuce, romaine or leaf lettuce                                                                                                                                                                                                                                                                                                                                                                                                                                                                                                                                                                                                                                                                                                                                            |
| Yellow/orange vegetables                  | Raw carrots, cooked carrots, yams or sweet potatoes, winter squash                                                                                                                                                                                                                                                                                                                                                                                                                                                                                                                                                                                                                                                                                                                                                       |
| Tomato                                    | Tomatoes, tomato sauce, salsa                                                                                                                                                                                                                                                                                                                                                                                                                                                                                                                                                                                                                                                                                                                                                                                            |
| Cruciferous vegetables                    | Broccoli, cabbage/Cole slaw, cauliflower, Brussels sprouts, kale/mustard greens/chard                                                                                                                                                                                                                                                                                                                                                                                                                                                                                                                                                                                                                                                                                                                                    |
| Other vegetables                          | Corn, mixed vegetables, eggplant/zucchini/other summer squash , celery, green pepper*, onion*, green beans, peas, mushroom*, beet*, alfalfa sprouts*                                                                                                                                                                                                                                                                                                                                                                                                                                                                                                                                                                                                                                                                     |
| Vitamin C rich fruits and vegetables      | Cantaloupe, orange, grapefruit, strawberries, broccoli, cabbage/Cole slaw, cauliflower, Brussels sprouts, kale/mustard greens/chard, green peppers                                                                                                                                                                                                                                                                                                                                                                                                                                                                                                                                                                                                                                                                       |
| Alpha carotene rich fruits and vegetables | Raw carrots, cooked carrots                                                                                                                                                                                                                                                                                                                                                                                                                                                                                                                                                                                                                                                                                                                                                                                              |
| Beta carotene rich fruits and vegetables  | Raw carrots, cooked carrots, yams/ sweet potatoes, raw spinach, cooked spinach, iceberg or head lettuce, romaine or leaf lettuce, kale/mustard greens/chard                                                                                                                                                                                                                                                                                                                                                                                                                                                                                                                                                                                                                                                              |
| Lutein rich fruits and vegetables         | Raw spinach, cooked spinach, kale/mustard greens/chard                                                                                                                                                                                                                                                                                                                                                                                                                                                                                                                                                                                                                                                                                                                                                                   |

\*Data are not available in all SFFQs

**Table S2: Hazard ratios and 95% confidence intervals of fruit and vegetable consumption in relation to incident invasive breast cancer among pre- and postmenopausal women in Nurses' Health Study and Nurses' Health Study II.**

|                                         | Consumption Levels |                          |                                      |                          |                   | <i>P</i> <sub>trend</sub> |
|-----------------------------------------|--------------------|--------------------------|--------------------------------------|--------------------------|-------------------|---------------------------|
|                                         | ≤2.5 servings/day  | >2.5 to 3.5 servings/day | >3.5 to 4.5 servings/day             | >4.5 to 5.5 servings/day | >5.5 servings/day |                           |
| <b>Total fruit and vegetable intake</b> |                    |                          |                                      |                          |                   |                           |
| Amount of intake                        | ≤2.5 servings/day  | >2.5 to 3.5 servings/day | >3.5 to 4.5 servings/day             | >4.5 to 5.5 servings/day | >5.5 servings/day |                           |
| Premenopausal breast cancer             |                    |                          |                                      |                          |                   |                           |
| No. of cases/person-years in NHS        | 247/136,348        | 204/114,780              | 172/87,794                           | 94/51,337                | 100/54,308        |                           |
| No. of cases/person-years in NHSII      | 359/269,793        | 387/258,489              | 313/225,431                          | 229/151,820              | 269/190,674       |                           |
| Model 1                                 | 1                  | 0.96 (0.86-1.08)         | 0.92 (0.82-1.04)                     | 0.93 (0.81-1.06)         | 0.88 (0.77-1.01)  | 0.05                      |
| Model 2                                 | 1                  | 0.96 (0.85-1.08)         | 0.92 (0.81-1.05)                     | 0.93 (0.80-1.07)         | 0.90 (0.77-1.04)  | 0.14                      |
| Postmenopausal breast cancer            |                    |                          |                                      |                          |                   |                           |
| No. of cases/person-years in NHS        | 951/272,216        | 1,379/385,808            | 1,512/403,944                        | 1,173/302,989            | 1,378/374,719     |                           |
| No. of cases/person-years in NHSII      | 232/98,455         | 245/117,923              | 255/115,032                          | 206/84,179               | 247/112,937       |                           |
| Model 1                                 | 1                  | 0.96 (0.89-1.03)         | 0.99 (0.91-1.06)                     | 1.01 (0.93-1.09)         | 0.94 (0.87-1.01)  | 0.28                      |
| Model 2                                 | 1                  | 0.92 (0.85-0.99)         | 0.93 (0.86-1.00)                     | 0.94 (0.86-1.02)         | 0.87 (0.80-0.95)  | 0.01                      |
| <b>Total fruit intake</b>               |                    |                          |                                      |                          |                   |                           |
| Amount of intake                        | ≤4 servings/week   | >4 to 6 servings/week    | >6 servings/week to 1.5 servings/day | >1.5 to 2.5 servings/day | >2.5 servings/day |                           |
| Premenopausal breast cancer             |                    |                          |                                      |                          |                   |                           |
| No. of cases/person-years in NHS        | 188/106,631        | 124/65,782               | 233/129,032                          | 212/100,671              | 60/42,451         |                           |
| No. of cases/person-years in NHSII      | 394/295,605        | 280/191,165              | 491/339,128                          | 307/208,905              | 85/61,405         |                           |
| Model 1                                 | 1                  | 1.00 (0.88-1.14)         | 0.94 (0.84-1.05)                     | 1.00 (0.88-1.12)         | 0.83 (0.69-1.00)  | 0.13                      |
| Model 2                                 | 1                  | 1.02 (0.90-1.16)         | 0.96 (0.86-1.08)                     | 1.03 (0.90-1.17)         | 0.86 (0.71-1.05)  | 0.35                      |
| Postmenopausal breast cancer            |                    |                          |                                      |                          |                   |                           |
| No. of cases/person-years in NHS        | 769/221,270        | 780/208,668              | 1,957/539,996                        | 2,091/540,658            | 796/229,083       |                           |
| No. of cases/person-years in NHSII      | 256/110,912        | 191/88,663               | 401/173,823                          | 269/120,743              | 68/34,384         |                           |
| Model 1                                 | 1                  | 1.00 (0.92-1.10)         | 0.97 (0.90-1.04)                     | 1.00 (0.93-1.08)         | 0.90 (0.82-0.99)  | 0.07                      |
| Model 2                                 | 1                  | 0.98 (0.89-1.07)         | 0.94 (0.87-1.01)                     | 0.97 (0.90-1.05)         | 0.89 (0.81-0.99)  | 0.09                      |
| <b>Total vegetable intake</b>           |                    |                          |                                      |                          |                   |                           |
| Amount of intake                        | ≤1.5 servings/day  | >1.5 to 2.5 servings/day | >2.5 to 3.5 servings/day             | >3.5 to 4.5 servings/day | >4.5 servings/day |                           |
| Premenopausal breast cancer             |                    |                          |                                      |                          |                   |                           |
| No. of cases/person-years in NHS        | 232/128,992        | 298/164,979              | 177/96,693                           | 71/35,207                | 39/18,696         |                           |
| No. of cases/person-years in NHSII      | 242/185,939        | 511/350,943              | 423/285,815                          | 206/153,677              | 175/119,833       |                           |
| Model 1                                 | 1                  | 0.94 (0.84-1.06)         | 0.90 (0.79-1.02)                     | 0.85 (0.73-0.99)         | 0.92 (0.78-1.08)  | 0.09                      |
| Model 2                                 | 1                  | 0.93 (0.83-1.05)         | 0.89 (0.78-1.02)                     | 0.85 (0.72-1.00)         | 0.93 (0.77-1.11)  | 0.19                      |
| Postmenopausal breast cancer            |                    |                          |                                      |                          |                   |                           |
| No. of cases/person-years in NHS        | 829/245,423        | 2,100/589,355            | 2,015/516,687                        | 921/248,460              | 528/139,750       |                           |
| No. of cases/person-years in NHSII      | 154/66,358         | 345/156,586              | 320/149,047                          | 207/86,747               | 159/69,787        |                           |
| Model 1                                 | 1                  | 0.98 (0.91-1.05)         | 1.03 (0.95-1.11)                     | 0.98 (0.90-1.07)         | 0.99 (0.89-1.09)  | 0.94                      |
| Model 2                                 | 1                  | 0.92 (0.85-0.99)         | 0.94 (0.86-1.02)                     | 0.89 (0.81-0.97)         | 0.89 (0.80-0.99)  | 0.05                      |

| <b>Fruit juice Intake</b>           |                 |                       |                       |                                      |                   |      |
|-------------------------------------|-----------------|-----------------------|-----------------------|--------------------------------------|-------------------|------|
| Amount of intake                    | ≤1 serving/week | >1 to 4 servings/week | >4 to 6 servings/week | >6 servings/week to 1.5 servings/day | >1.5 servings/day |      |
| <b>Premenopausal breast cancer</b>  |                 |                       |                       |                                      |                   |      |
| No. of cases/person-years in NHS    | 145/72,038      | 133/78,045            | 130/73,766            | 267/147,268                          | 132/67,821        |      |
| No. of cases/person-years in NHSII  | 217/171,248     | 450/321,133           | 208/148,101           | 348/223,511                          | 334/232,169       |      |
| Model 1                             | 1               | 0.97 (0.84-1.10)      | 0.98 (0.84-1.14)      | 1.05 (0.92-1.20)                     | 1.02 (0.89-1.18)  | 0.30 |
| Model 2                             | 1               | 0.96 (0.84-1.10)      | 0.98 (0.84-1.14)      | 1.04 (0.91-1.19)                     | 1.00 (0.86-1.16)  | 0.48 |
| <b>Postmenopausal breast cancer</b> |                 |                       |                       |                                      |                   |      |
| No. of cases/person-years in NHS    | 593/179,990     | 1,283/352,998         | 945/254,723           | 1,842/518,752                        | 1,715/424,624     |      |
| No. of cases/person-years in NHSII  | 161/78,030      | 361/164,869           | 186/77,468            | 249/111,445                          | 228/96,709        |      |
| Model 1                             | 1               | 1.03 (0.95-1.13)      | 1.08 (0.99-1.19)      | 1.03 (0.95-1.12)                     | 1.12 (1.03-1.22)  | 0.01 |
| Model 2                             | 1               | 0.99 (0.91-1.08)      | 1.05 (0.95-1.15)      | 0.99 (0.91-1.08)                     | 1.05 (0.96-1.15)  | 0.21 |

Model 1 stratified by cohort, calendar year, and age in months.

Model 2 stratified by cohort, calendar year, and age in months and adjusted for family history of breast cancer (yes, no), history of benign breast disease (yes, no), height (<1.60, 1.60 to <1.65, 1.65 to <1.70, 1.70 to <1.75, and ≥1.75 meters), BMI at age 18 years (<18.5, 18.5 to <20, 20 to <22.5, 22.5 to <25, 25.0 to <30, ≥30.0 kg/m<sup>2</sup>), weight change since age 18 years (continuous), smoking (never, past, current 1-14/day, current 15-24/day, current ≥25/day), physical activity (quintiles of MET-hr per week, missing), oral contraceptive use (never, < 2 years, 2 to <5 years, 5 to <10 years, ≥10 years), alcohol intake (g/day, quintiles), total energy intake (kcal/day, quintiles), age at menarche (<12, 12, 13, 14, >14 years), parity and age at first birth (nulliparous, parity ≤2 and age at first birth <25 years, parity ≤2 and age at first birth 25 to <30 years, parity ≤2 and age at first birth ≥30 years, parity 3 to 4 and age at first birth <25 years, parity 3 to 4 and age at first birth 25 to <30 years, parity 3 to 4 and age at first birth ≥30 years, parity ≥5 and age at first birth <25 years, parity ≥5 and age at first birth ≥25 years). In postmenopausal women, we additionally adjusted for age at menopause, and postmenopausal hormone use (age at menopause <50 years and never postmenopausal hormone use, age at menopause <50y and past postmenopausal hormone use, age at menopause <50y and current postmenopausal hormone use, age at menopause ≥50 years and never postmenopausal hormone use, age at menopause ≥50 years and past postmenopausal hormone use, age at menopause ≥50 years and current postmenopausal hormone use, missing).

**Table S3: Hazard ratios and 95% confidence intervals of subgroups of fruit and vegetable consumption in relation to incident invasive breast cancer among pre- and postmenopausal women in Nurses' Health Study and Nurses' Health Study II.**

|                                       | Consumption Levels |                       |                       |                                   |                  | <i>P</i> <sub>trend</sub> |
|---------------------------------------|--------------------|-----------------------|-----------------------|-----------------------------------|------------------|---------------------------|
| <b>Green leafy vegetable intake</b>   |                    |                       |                       |                                   |                  |                           |
| Amount of intake                      | ≤2 servings/week   | >2 to 4 servings/week | >4 to 6 servings/week | >6 servings/week to 1 serving/day | >1 servings/day  |                           |
| Premenopausal breast cancer           |                    |                       |                       |                                   |                  |                           |
| No. of cases/person-years in NHS      | 296/172,178        | 236/125,139           | 136/71,767            | 73/35,883                         | 74/36,754        |                           |
| No. of cases/person-years in NHSII    | 332/254,636        | 419/315,414           | 360/221,754           | 130/97,638                        | 316/206,651      |                           |
| Model 1                               | 1                  | 0.91 (0.81-1.02)      | 0.95 (0.84-1.07)      | 0.91 (0.78-1.07)                  | 0.90 (0.79-1.03) | 0.21                      |
| Model 2                               | 1                  | 0.90 (0.80-1.01)      | 0.93 (0.82-1.06)      | 0.88 (0.75-1.04)                  | 0.88 (0.76-1.01) | 0.12                      |
| Postmenopausal breast cancer          |                    |                       |                       |                                   |                  |                           |
| No. of cases/person-years in NHS      | 1,060/332,349      | 1,810/485,955         | 1,650/433,098         | 617/164,592                       | 1,249/319,967    |                           |
| No. of cases/person-years in NHSII    | 164/74,909         | 301/132,496           | 279/125,351           | 98/51,032                         | 343/144,726      |                           |
| Model 1                               | 1                  | 1.06 (0.99-1.14)      | 1.06 (0.98-1.14)      | 1.04 (0.94-1.14)                  | 1.08 (1.00-1.16) | 0.16                      |
| Model 2                               | 1                  | 0.98 (0.91-1.05)      | 0.94 (0.87-1.02)      | 0.92 (0.83-1.01)                  | 0.94 (0.86-1.02) | 0.06                      |
| <b>Yellow/orange vegetable intake</b> |                    |                       |                       |                                   |                  |                           |
| Amount of intake                      | ≤2 servings/week   | >2 to 3 servings/week | >3 to 4 servings/week | >4 to 5 servings/week             | >5 servings/week |                           |
| Premenopausal breast cancer           |                    |                       |                       |                                   |                  |                           |
| No. of cases/person-years in NHS      | 532/288,256        | 140/66,547            | 70/46,508             | 30/15,240                         | 45/27,955        |                           |
| No. of cases/person-years in NHSII    | 941/683,018        | 279/187,577           | 169/102,859           | 67/58,502                         | 101/64,173       |                           |
| Model 1                               | 1                  | 0.97 (0.87-1.08)      | 0.96 (0.83-1.10)      | 0.82 (0.67-1.01)                  | 0.99 (0.83-1.18) | 0.28                      |
| Model 2                               | 1                  | 0.97 (0.87-1.08)      | 0.96 (0.84-1.11)      | 0.83 (0.67-1.02)                  | 1.01 (0.85-1.20) | 0.44                      |
| Postmenopausal breast cancer          |                    |                       |                       |                                   |                  |                           |
| No. of cases/person-years in NHS      | 3,326/909,868      | 1,454/376,883         | 814/227,859           | 413/107,156                       | 386/117,816      |                           |
| No. of cases/person-years in NHSII    | 665/299,497        | 244/108,803           | 140/58,058            | 65/29,438                         | 71/32,730        |                           |
| Model 1                               | 1                  | 1.00 (0.95-1.06)      | 0.96 (0.89-1.03)      | 0.98 (0.89-1.08)                  | 0.87 (0.79-0.96) | 0.01                      |
| Model 2                               | 1                  | 0.98 (0.92-1.04)      | 0.94 (0.87-1.01)      | 0.96 (0.87-1.06)                  | 0.87 (0.79-0.97) | 0.006                     |
| <b>Tomato intake</b>                  |                    |                       |                       |                                   |                  |                           |
| Amount of intake                      | ≤2 servings/week   | >2 to 4 servings/week | >4 to 6 servings/week | >6 servings/week to 1 serving/day | >1 servings/day  |                           |
| Premenopausal breast cancer           |                    |                       |                       |                                   |                  |                           |
| No. of cases/person-years in NHS      | 252/153,197        | 317/164,769           | 146/76,485            | 55/31,523                         | 39/16,804        |                           |
| No. of cases/person-years in NHSII    | 378/301,669        | 527/345,220           | 360/255,711           | 110/63,693                        | 182/129,745      |                           |
| Model 1                               | 1                  | 1.00 (0.90-1.11)      | 0.95 (0.84-1.07)      | 1.06 (0.89-1.26)                  | 1.02 (0.88-1.20) | 0.86                      |
| Model 2                               | 1                  | 1.00 (0.90-1.11)      | 0.95 (0.84-1.08)      | 1.07 (0.89-1.27)                  | 1.05 (0.89-1.24) | 0.66                      |
| Postmenopausal breast cancer          |                    |                       |                       |                                   |                  |                           |
| No. of cases/person-years in NHS      | 1,318/387,236      | 2,664/721,674         | 1,568/410,922         | 418/113,717                       | 421/103,785      |                           |
| No. of cases/person-years in NHSII    | 248/118,173        | 461/203,895           | 296/126,619           | 59/32,292                         | 121/47,517       |                           |
| Model 1                               | 1                  | 1.04 (0.98-1.11)      | 1.07 (1.00-1.14)      | 1.03 (0.93-1.14)                  | 1.14 (1.03-1.25) | 0.02                      |
| Model 2                               | 1                  | 1.00 (0.94-1.07)      | 1.01 (0.94-1.08)      | 0.99 (0.89-1.10)                  | 1.06 (0.95-1.17) | 0.52                      |

| <b>Cruciferous vegetable intake</b>            |                  |                       |                       |                                   |                  |       |
|------------------------------------------------|------------------|-----------------------|-----------------------|-----------------------------------|------------------|-------|
| Amount of intake                               | ≤2 servings/week | >2 to 3 servings/week | >3 to 4 servings/week | >4 to 5 servings/week             | >5 servings/week |       |
| Premenopausal breast cancer                    |                  |                       |                       |                                   |                  |       |
| No. of cases/person-years in NHS               | 473/266,916      | 129/62,156            | 90/53,754             | 45/18,941                         | 79/42,605        |       |
| No. of cases/person-years in NHSII             | 734/525,813      | 316/207,431           | 205/139,501           | 121/85,083                        | 181/138,312      |       |
| Model 1                                        | 1                | 0.95 (0.85-1.06)      | 0.88 (0.77-1.00)      | 0.91 (0.77-1.07)                  | 0.86 (0.75-0.99) | 0.01  |
| Model 2                                        | 1                | 0.95 (0.85-1.07)      | 0.88 (0.77-1.01)      | 0.92 (0.78-1.09)                  | 0.89 (0.78-1.03) | 0.05  |
| Postmenopausal breast cancer                   |                  |                       |                       |                                   |                  |       |
| No. of cases/person-years in NHS               | 2,352/663,875    | 1,517/388,306         | 1,055/288,503         | 638/163,748                       | 830/234,901      |       |
| No. of cases/person-years in NHSII             | 459/203,641      | 260/114,196           | 187/79,933            | 124/50,438                        | 155/80,317       |       |
| Model 1                                        | 1                | 1.02 (0.96-1.08)      | 0.97 (0.91-1.04)      | 1.01 (0.93-1.09)                  | 0.91 (0.85-0.98) | 0.02  |
| Model 2                                        | 1                | 0.98 (0.92-1.04)      | 0.94 (0.87-1.00)      | 0.96 (0.88-1.04)                  | 0.89 (0.83-0.96) | 0.003 |
| <b>Other vegetable intake</b>                  |                  |                       |                       |                                   |                  |       |
| Amount of intake                               | ≤2 servings/week | >2 to 4 servings/week | >4 to 6 servings/week | >6 servings/week to 1 serving/day | >1 servings/day  |       |
| Premenopausal breast cancer                    |                  |                       |                       |                                   |                  |       |
| No. of cases/person-years in NHS               | 129/70,780       | 287/154,519           | 190/109,370           | 100/46,502                        | 111/63,380       |       |
| No. of cases/person-years in NHSII             | 123/93,154       | 400/285,670           | 433/281,685           | 149/105,699                       | 452/329,971      |       |
| Model 1                                        | 1                | 0.94 (0.81-1.09)      | 0.92 (0.79-1.07)      | 0.96 (0.80-1.14)                  | 0.87 (0.74-1.01) | 0.09  |
| Model 2                                        | 1                | 0.94 (0.81-1.09)      | 0.93 (0.79-1.09)      | 0.97 (0.81-1.17)                  | 0.90 (0.76-1.06) | 0.36  |
| Postmenopausal breast cancer                   |                  |                       |                       |                                   |                  |       |
| No. of cases/person-years in NHS               | 381/126,589      | 1,759/482,679         | 1,986/529,336         | 773/200,333                       | 1,494/400,691    |       |
| No. of cases/person-years in NHSII             | 80/33,157        | 282/123,184           | 313/140,707           | 114/56,723                        | 396/174,755      |       |
| Model 1                                        | 1                | 1.07 (0.96-1.18)      | 1.06 (0.95-1.17)      | 1.07 (0.95-1.20)                  | 1.04 (0.94-1.15) | 0.82  |
| Model 2                                        | 1                | 1.01 (0.91-1.12)      | 0.99 (0.89-1.10)      | 0.99 (0.88-1.12)                  | 0.96 (0.86-1.07) | 0.15  |
| <b>Fruits and vegetables high in vitamin C</b> |                  |                       |                       |                                   |                  |       |
| Amount of intake                               | ≤2 servings/week | >2 to 4 servings/week | >4 to 6 servings/week | >6 servings/week to 1 serving/day | >1 servings/day  |       |
| Premenopausal breast cancer                    |                  |                       |                       |                                   |                  |       |
| No. of cases/person-years in NHS               | 207/112,013      | 215/124,924           | 160/87,782            | 72/35,556                         | 163/84,282       |       |
| No. of cases/person-years in NHSII             | 219/164,852      | 473/335,703           | 384/257,696           | 127/87,425                        | 354/250,527      |       |
| Model 1                                        | 1                | 0.88 (0.78-1.00)      | 0.88 (0.77-1.00)      | 0.88 (0.74-1.04)                  | 0.84 (0.74-0.96) | 0.05  |
| Model 2                                        | 1                | 0.89 (0.78-1.00)      | 0.89 (0.77-1.01)      | 0.89 (0.75-1.06)                  | 0.87 (0.75-1.00) | 0.17  |
| Postmenopausal breast cancer                   |                  |                       |                       |                                   |                  |       |
| No. of cases/person-years in NHS               | 543/172,350      | 1,461/396,223         | 1,583/426,530         | 728/179,381                       | 2,078/565,166    |       |
| No. of cases/person-years in NHSII             | 137/56,629       | 314/144,779           | 306/134,558           | 122/49,387                        | 306/143,173      |       |
| Model 1                                        | 1                | 1.02 (0.93-1.12)      | 1.01 (0.92-1.10)      | 1.10 (0.99-1.22)                  | 0.97 (0.89-1.06) | 0.19  |
| Model 2                                        | 1                | 0.95 (0.87-1.04)      | 0.91 (0.83-1.00)      | 1.00 (0.90-1.11)                  | 0.89 (0.81-0.97) | 0.01  |

| <b>Fruits and vegetables high in <math>\alpha</math>-carotene</b> |                        |                        |                        |                                   |                        |       |
|-------------------------------------------------------------------|------------------------|------------------------|------------------------|-----------------------------------|------------------------|-------|
| Amount of intake                                                  | <2 servings/month      | 2 to <4 servings/month | 1 to <2 servings/week  | 2 to <3 servings/week             | $\geq 3$ servings/week |       |
| <b>Premenopausal breast cancer</b>                                |                        |                        |                        |                                   |                        |       |
| No. of cases/person-years in NHS                                  | 81/39,155              | 262/134,924            | 263/150,031            | 65/33,330                         | 143/85,978             |       |
| No. of cases/person-years in NHSII                                | 224/164,350            | 411/303,726            | 479/328,370            | 213/140,953                       | 230/158,640            |       |
| Model 1                                                           | 1                      | 0.95 (0.83-1.09)       | 0.91 (0.79-1.04)       | 0.86 (0.73-1.01)                  | 0.91 (0.78-1.07)       | 0.19  |
| Model 2                                                           | 1                      | 0.96 (0.83-1.10)       | 0.92 (0.80-1.05)       | 0.87 (0.74-1.03)                  | 0.94 (0.80-1.10)       | 0.38  |
| <b>Postmenopausal breast cancer</b>                               |                        |                        |                        |                                   |                        |       |
| No. of cases/person-years in NHS                                  | 546/135,972            | 1,685/462,945          | 2,197/596,329          | 1,022/268,715                     | 941/274,080            |       |
| No. of cases/person-years in NHSII                                | 153/67,840             | 308/134,102            | 392/172,704            | 173/84,613                        | 159/69,256             |       |
| Model 1                                                           | 1                      | 0.93 (0.85-1.01)       | 0.92 (0.85-1.00)       | 0.89 (0.81-0.98)                  | 0.87 (0.79-0.96)       | 0.01  |
| Model 2                                                           | 1                      | 0.92 (0.84-1.00)       | 0.91 (0.83-0.99)       | 0.87 (0.79-0.95)                  | 0.88 (0.79-0.97)       | 0.02  |
| <b>Fruits and vegetables high in <math>\beta</math>-carotene</b>  |                        |                        |                        |                                   |                        |       |
| Amount of intake                                                  | $\leq 2$ servings/week | >2 to 4 servings/week  | >4 to 6 servings/week  | >6 servings/week to 1 serving/day | >1 servings/day        |       |
| <b>Premenopausal breast cancer</b>                                |                        |                        |                        |                                   |                        |       |
| No. of cases/person-years in NHS                                  | 190/109,172            | 181/107,273            | 166/84,315             | 78/37,300                         | 202/106,477            |       |
| No. of cases/person-years in NHSII                                | 139/111,356            | 306/227,124            | 344/238,571            | 148/102,195                       | 620/416,917            |       |
| Model 1                                                           | 1                      | 0.87 (0.75-1.01)       | 0.90 (0.77-1.04)       | 0.89 (0.74-1.06)                  | 0.85 (0.74-0.98)       | 0.10  |
| Model 2                                                           | 1                      | 0.86 (0.74-0.99)       | 0.88 (0.75-1.02)       | 0.87 (0.72-1.04)                  | 0.83 (0.71-0.96)       | 0.06  |
| <b>Postmenopausal breast cancer</b>                               |                        |                        |                        |                                   |                        |       |
| No. of cases/person-years in NHS                                  | 465/154,139            | 1,094/308,314          | 1,449/389,447          | 750/189,838                       | 2,635/697,909          |       |
| No. of cases/person-years in NHSII                                | 73/29,152              | 185/85,075             | 243/106,655            | 121/53,495                        | 563/254,147            |       |
| Model 1                                                           | 1                      | 1.02 (0.92-1.13)       | 1.03 (0.93-1.14)       | 1.08 (0.97-1.21)                  | 1.02 (0.92-1.12)       | 0.94  |
| Model 2                                                           | 1                      | 0.93 (0.84-1.03)       | 0.90 (0.81-1.00)       | 0.93 (0.83-1.05)                  | 0.86 (0.78-0.95)       | 0.002 |
| <b>Fruits and vegetables high in lutein</b>                       |                        |                        |                        |                                   |                        |       |
| Amount of intake                                                  | $\leq 1$ serving/month | >1 to 3 servings/month | >3 to 4 servings/month | >1 to 3 servings/week             | >3 servings/week       |       |
| <b>Premenopausal breast cancer</b>                                |                        |                        |                        |                                   |                        |       |
| No. of cases/person-years in NHS                                  | 89/44,900              | 183/101,146            | 202/104,877            | 236/128,566                       | 105/62,231             |       |
| No. of cases/person-years in NHSII                                | 436/342,771            | 533/353,529            | 244/171,242            | 287/189,370                       | 57/39,041              |       |
| Model 1                                                           | 1                      | 1.00 (0.89-1.12)       | 1.06 (0.93-1.21)       | 0.94 (0.83-1.07)                  | 0.99 (0.82-1.19)       | 0.60  |
| Model 2                                                           | 1                      | 0.97 (0.86-1.09)       | 1.01 (0.88-1.15)       | 0.89 (0.78-1.01)                  | 0.93 (0.77-1.12)       | 0.27  |
| <b>Postmenopausal breast cancer</b>                               |                        |                        |                        |                                   |                        |       |
| No. of cases/person-years in NHS                                  | 667/191,615            | 1,659/441,381          | 1,117/313,276          | 2,455/640,277                     | 488/149,399            |       |
| No. of cases/person-years in NHSII                                | 266/125,208            | 375/166,005            | 160/78,083             | 325/135,210                       | 59/23,987              |       |
| Model 1                                                           | 1                      | 1.07 (0.99-1.15)       | 1.04 (0.95-1.13)       | 1.08 (1.00-1.16)                  | 1.01 (0.90-1.12)       | 0.94  |
| Model 2                                                           | 1                      | 1.03 (0.96-1.12)       | 1.01 (0.92-1.10)       | 1.01 (0.94-1.09)                  | 0.97 (0.87-1.09)       | 0.38  |

Model 1 stratified by cohort, calendar year, and age in months.

Model 2 stratified by cohort, calendar year, and age in months and adjusted for family history of breast cancer (yes, no), history of benign breast disease (yes, no), height (<1.60, 1.60 to <1.65, 1.65 to <1.70, 1.70 to <1.75, and  $\geq 1.75$  meters), BMI at age 18 years (<18.5, 18.5 to <20, 20 to <22.5, 22.5 to <25, 25.0 to <30,  $\geq 30.0$  kg/m<sup>2</sup>), weight change since age 18 years (continuous), smoking (never, past, current 1-14/day, current 15-24/day, current  $\geq 25$ /day), physical activity (quintiles of MET-hr per week, missing), oral contraceptive use (never, < 2 years, 2 to <5 years, 5 to <10 years,  $\geq 10$  years), alcohol intake (g/day, quintiles), total energy intake (kcal/day, quintiles), age at menarche (<12, 12, 13, 14, >14 years), parity and age at first birth (nulliparous, parity  $\leq 2$  and age at first birth <25 years, parity  $\leq 2$  and age at first birth

25 to <30 years, parity  $\leq 2$  and age at first birth  $\geq 30$  years, parity 3 to 4 and age at first birth <25 years, parity 3 to 4 and age at first birth 25 to <30 years, parity 3 to 4 and age at first birth  $\geq 30$  years, parity  $\geq 5$  and age at first birth <25 years, parity  $\geq 5$  and age at first birth  $\geq 25$  years). In postmenopausal women, we additionally adjusted for age at menopause, and postmenopausal hormone use (age at menopause <50 years and never postmenopausal hormone use, age at menopause <50y and past postmenopausal hormone use, age at menopause <50y and current postmenopausal hormone use, age at menopause  $\geq 50$  years and never postmenopausal hormone use, age at menopause  $\geq 50$  years and past postmenopausal hormone use, age at menopause  $\geq 50$  years and current postmenopausal hormone use, missing).

**Table S4: Time lagged analyses on breast cancer by estrogen and progesterone receptor status according to fruit and vegetable consumption in pooling data from Nurses' Health Study and Nurses' Health Study II.**

| Breast cancer subtype                                         | No. of cases | Total fruit and vegetable intake (per 2 servings/day) | Total fruit intake (per 2 servings/day) | Total vegetable intake (per 2 servings/day) |
|---------------------------------------------------------------|--------------|-------------------------------------------------------|-----------------------------------------|---------------------------------------------|
|                                                               |              | HR (95%CI)                                            | HR (95%CI)                              | HR (95%CI)                                  |
| <b>0-4 year lag</b>                                           |              |                                                       |                                         |                                             |
| Estrogen receptor positive                                    | 6,584        | 0.98 (0.95-1.01)                                      | 0.96 (0.91-1.03)                        | 1.00 (0.96-1.05)                            |
| Estrogen receptor negative                                    | 1,598        | 0.95 (0.90-1.00)                                      | 0.95 (0.85-1.08)                        | 0.90 (0.83-0.97)                            |
| P for Heterogeneity                                           |              | 0.23                                                  | 0.87                                    | 0.01                                        |
| <b>4-8 year lag</b>                                           |              |                                                       |                                         |                                             |
| Estrogen receptor positive                                    | 6,129        | 1.00 (0.97-1.03)                                      | 1.02 (0.96-1.09)                        | 1.01 (0.97-1.06)                            |
| Estrogen receptor negative                                    | 1,388        | 0.91 (0.85-0.97)                                      | 0.88 (0.77-1.00)                        | 0.85 (0.78-0.93)                            |
| P for Heterogeneity                                           |              | 0.004                                                 | 0.04                                    | 0.0004                                      |
| <b>8-12 year lag</b>                                          |              |                                                       |                                         |                                             |
| Estrogen receptor positive                                    | 5,448        | 0.99 (0.95-1.02)                                      | 1.01 (0.94-1.08)                        | 0.97 (0.92-1.01)                            |
| Estrogen receptor negative                                    | 1,139        | 0.94 (0.88-1.00)                                      | 0.93 (0.80-1.07)                        | 0.92 (0.83-1.01)                            |
| P for Heterogeneity                                           |              | 0.19                                                  | 0.29                                    | 0.34                                        |
| <b>12-16 year lag</b>                                         |              |                                                       |                                         |                                             |
| Estrogen receptor positive                                    | 4,405        | 0.94 (0.91-0.98)                                      | 0.91 (0.84-0.98)                        | 0.93 (0.88-0.98)                            |
| Estrogen receptor negative                                    | 877          | 0.96 (0.89-1.04)                                      | 0.89 (0.75-1.05)                        | 0.95 (0.85-1.06)                            |
| P for Heterogeneity                                           |              | 0.64                                                  | 0.84                                    | 0.69                                        |
|                                                               |              |                                                       |                                         |                                             |
| <b>0-4 year lag</b>                                           |              |                                                       |                                         |                                             |
| Estrogen and progesterone receptor positive                   | 5,399        | 0.98 (0.95-1.01)                                      | 0.98 (0.91-1.04)                        | 1.00 (0.96-1.04)                            |
| Estrogen receptor positive and progesterone receptor negative | 1,076        | 1.01 (0.95-1.08)                                      | 0.98 (0.84-1.13)                        | 1.03 (0.94-1.13)                            |
| Estrogen and progesterone receptor negative                   | 1,406        | 0.94 (0.89-1.00)                                      | 0.93 (0.82-1.06)                        | 0.91 (0.84-0.99)                            |
| P for Heterogeneity                                           |              | 0.26                                                  | 0.83                                    | 0.09                                        |
| <b>4-8 year lag</b>                                           |              |                                                       |                                         |                                             |
| Estrogen and progesterone receptor positive                   | 5,049        | 1.01 (0.98-1.04)                                      | 1.06 (0.98-1.13)                        | 1.01 (0.97-1.06)                            |
| Estrogen receptor positive and progesterone receptor negative | 1,008        | 0.96 (0.89-1.03)                                      | 0.89 (0.77-1.04)                        | 0.99 (0.90-1.10)                            |
| Estrogen and progesterone receptor negative                   | 1,234        | 0.91 (0.85-0.97)                                      | 0.89 (0.78-1.03)                        | 0.86 (0.78-0.94)                            |
| P for Heterogeneity                                           |              | 0.01                                                  | 0.03                                    | 0.005                                       |
| <b>8-12 year lag</b>                                          |              |                                                       |                                         |                                             |
| Estrogen and progesterone receptor positive                   | 4,497        | 1.00 (0.96-1.04)                                      | 1.04 (0.96-1.12)                        | 0.98 (0.93-1.03)                            |
| Estrogen receptor positive and progesterone receptor negative | 888          | 0.94 (0.87-1.01)                                      | 0.91 (0.77-1.07)                        | 0.92 (0.83-1.03)                            |
| Estrogen and progesterone receptor negative                   | 1,017        | 0.94 (0.87-1.01)                                      | 0.90 (0.77-1.05)                        | 0.94 (0.85-1.04)                            |
| P for Heterogeneity                                           |              | 0.14                                                  | 0.12                                    | 0.50                                        |



|                                                               |       |                  |                  |                  |
|---------------------------------------------------------------|-------|------------------|------------------|------------------|
| <b>12-16 year lag</b>                                         |       |                  |                  |                  |
| Estrogen and progesterone receptor positive                   | 3,664 | 0.93 (0.89-0.97) | 0.90 (0.83-0.98) | 0.91 (0.86-0.97) |
| Estrogen receptor positive and progesterone receptor negative | 696   | 1.02 (0.93-1.11) | 0.91 (0.76-1.10) | 1.01 (0.89-1.15) |
| Estrogen and progesterone receptor negative                   | 798   | 0.96 (0.88-1.04) | 0.89 (0.75-1.06) | 0.93 (0.83-1.05) |
| P for Heterogeneity                                           |       | 0.15             | 0.99             | 0.30             |

Stratified by cohort, calendar year, and age in months and adjusted for family history of breast cancer (yes, no), history of benign breast disease (yes, no), height (<1.60, 1.60 to <1.65, 1.65 to <1.70, 1.70 to <1.75, and ≥1.75 meters), BMI at age 18 years (<18.5, 18.5 to <20, 20 to <22.5, 22.5 to <25, 25.0 to <30, ≥30.0 kg/m<sup>2</sup>), weight change since age 18 years (continuous), smoking (never, past, current 1-14/day, current 15-24/day, current ≥25/day), physical activity (quintiles of MET-hr per week, missing), oral contraceptive use (never, < 2 years, 2 to <5 years, 5 to <10 years, ≥10 years), alcohol intake (g/day, quintiles), total energy intake (kcal/day, quintiles), age at menarche (<12, 12, 13, 14, >14 years), parity and age at first birth (nulliparous, parity ≤2 and age at first birth <25 years, parity ≤2 and age at first birth 25 to <30 years, parity ≤2 and age at first birth ≥30 years, parity 3 to 4 and age at first birth <25 years, parity 3 to 4 and age at first birth 25 to <30 years, parity 3 to 4 and age at first birth ≥30 years, parity ≥5 and age at first birth <25 years, parity ≥5 and age at first birth ≥25 years), and menopausal status, age at menopause, and postmenopausal hormone use (premenopausal, postmenopausal and age at menopause <50 years and never postmenopausal hormone use, postmenopausal and age at menopause <50 years and past postmenopausal hormone use, postmenopausal and age at menopause <50 years and current postmenopausal hormone use, postmenopausal and age at menopause ≥50 years and never postmenopausal hormone use, postmenopausal and age at menopause ≥50 years and past postmenopausal hormone use, postmenopausal and age at menopause ≥50 years and current postmenopausal hormone use, missing).

**Table S5: Hazard ratios and 95% confidence intervals of fruit and vegetable consumption in relation to incident invasive breast cancer (n=10,911 cases) additionally adjusted for AHEI, animal fat, and fiber intake.**

|                                         | Consumption Levels |                          |                                      |                                      |                   | <i>P</i> <sub>trend</sub> |
|-----------------------------------------|--------------------|--------------------------|--------------------------------------|--------------------------------------|-------------------|---------------------------|
|                                         | 1                  | 2                        | 3                                    | 4                                    | 5                 |                           |
| <b>Total fruit and vegetable intake</b> |                    |                          |                                      |                                      |                   |                           |
| Amount of intake                        | ≤2.5 servings/day  | >2.5 to 3.5 servings/day | >3.5 to 4.5 servings/day             | >4.5 to 5.5 servings/day             | >5.5 servings/day |                           |
| No. of cases/person-years in NHS        | 1,292/457,076      | 1,683/542,469            | 1,768/525,605                        | 1,324/376,169                        | 1,544/453,806     |                           |
| No. of cases/person-years in NHSII      | 722/450,298        | 761/452,651              | 693/405,921                          | 516/281,609                          | 608/363,466       |                           |
| Model 2                                 | 1                  | 0.94 (0.88-1.00)         | 0.94 (0.88-1.00)                     | 0.95 (0.89-1.02)                     | 0.89 (0.83-0.96)  | 0.006                     |
| Model 2 + AHEI                          | 1                  | 0.94 (0.88-0.99)         | 0.93 (0.88-1.00)                     | 0.95 (0.88-1.01)                     | 0.88 (0.82-0.95)  | 0.005                     |
| Model 2 + animal fat                    | 1                  | 0.94 (0.88-0.99)         | 0.94 (0.88-1.00)                     | 0.95 (0.88-1.01)                     | 0.89 (0.82-0.95)  | 0.005                     |
| Model 2 + fiber                         | 1                  | 0.94 (0.88-1.00)         | 0.95 (0.88-1.02)                     | 0.97 (0.89-1.05)                     | 0.92 (0.83-1.01)  | 0.21                      |
| <b>Total fruit intake</b>               |                    |                          |                                      |                                      |                   |                           |
| Amount of intake                        | ≤4 servings/week   | >4 to 6 servings/week    | >6 servings/week to 1.5 servings/day | >1.5 to 2.5 servings/day             | >2.5 servings/day |                           |
| No. of cases/person-years in NHS        | 1,023/365,517      | 963/298,599              | 2,311/718,399                        | 2,400/682,790                        | 914/289,822       |                           |
| No. of cases/person-years in NHSII      | 802/497,615        | 583/337,772              | 1,061/612,398                        | 677/391,529                          | 177/114,632       |                           |
| Model 2                                 | 1                  | 1.00 (0.94-1.07)         | 0.95 (0.90-1.01)                     | 0.99 (0.93-1.05)                     | 0.91 (0.84-0.99)  | 0.08                      |
| Model 2 + AHEI                          | 1                  | 1.00 (0.94-1.07)         | 0.95 (0.90-1.01)                     | 0.99 (0.92-1.05)                     | 0.91 (0.84-0.99)  | 0.08                      |
| Model 2 + animal fat                    | 1                  | 1.00 (0.94-1.07)         | 0.95 (0.89-1.01)                     | 0.98 (0.92-1.05)                     | 0.91 (0.83-0.99)  | 0.07                      |
| Model 2 + fiber                         | 1                  | 1.01 (0.94-1.08)         | 0.97 (0.91-1.04)                     | 1.02 (0.95-1.10)                     | 0.97 (0.88-1.07)  | 0.84                      |
| <b>Total vegetable intake</b>           |                    |                          |                                      |                                      |                   |                           |
| Amount of intake                        | ≤1.5 servings/day  | >1.5 to 2.5 servings/day | >2.5 to 3.5 servings/day             | >3.5 to 4.5 servings/day             | >4.5 servings/day |                           |
| No. of cases/person-years in NHS        | 1,155/421,021      | 2,547/815,680            | 2,282/651,837                        | 1,034/299,308                        | 593/167,280       |                           |
| No. of cases/person-years in NHSII      | 483/308,753        | 1,034/610,319            | 898/518,716                          | 487/287,107                          | 398/229,049       |                           |
| Model 2                                 | 1                  | 0.93 (0.88-0.99)         | 0.94 (0.88-1.00)                     | 0.89 (0.82-0.96)                     | 0.91 (0.84-1.00)  | 0.03                      |
| Model 2 + AHEI                          | 1                  | 0.93 (0.87-0.99)         | 0.93 (0.87-1.00)                     | 0.88 (0.82-0.96)                     | 0.91 (0.83-0.99)  | 0.03                      |
| Model 2 + animal fat                    | 1                  | 0.93 (0.88-0.99)         | 0.93 (0.88-1.00)                     | 0.89 (0.82-0.96)                     | 0.91 (0.83-0.99)  | 0.03                      |
| Model 2 + fiber                         | 1                  | 0.94 (0.88-1.00)         | 0.95 (0.88-1.02)                     | 0.91 (0.84-1.00)                     | 0.95 (0.86-1.06)  | 0.45                      |
| <b>Fruit juice Intake</b>               |                    |                          |                                      |                                      |                   |                           |
| Amount of intake                        | ≤1 serving/week    | >1 to 4 servings/week    | >4 to 6 servings/week                | >6 servings/week to 1.5 servings/day | >1.5 servings/day |                           |
| No. of cases/person-years in NHS        | 800/278,959        | 1,497/462,795            | 1,140/356,775                        | 2,237/720,158                        | 1,908/520,020     |                           |
| No. of cases/person-years in NHSII      | 464/301,403        | 994/586,374              | 468/271,764                          | 704/401,579                          | 670/392,752       |                           |
| Model 2                                 | 1                  | 0.99 (0.92-1.06)         | 1.02 (0.94-1.10)                     | 0.99 (0.93-1.06)                     | 1.03 (0.96-1.10)  | 0.31                      |
| Model 2 + AHEI                          | 1                  | 0.99 (0.92-1.06)         | 1.02 (0.95-1.10)                     | 0.99 (0.93-1.06)                     | 1.03 (0.96-1.11)  | 0.30                      |
| Model 2 + animal fat                    | 1                  | 0.99 (0.92-1.06)         | 1.02 (0.94-1.10)                     | 0.99 (0.93-1.06)                     | 1.03 (0.96-1.10)  | 0.30                      |
| Model 2 + fiber                         | 1                  | 0.99 (0.92-1.06)         | 1.02 (0.95-1.10)                     | 0.99 (0.93-1.06)                     | 1.03 (0.96-1.11)  | 0.26                      |

| <b>Green leafy vegetable intake</b>   |                  |                       |                       |                                   |                  |        |
|---------------------------------------|------------------|-----------------------|-----------------------|-----------------------------------|------------------|--------|
| Amount of intake                      | ≤2 servings/week | >2 to 4 servings/week | >4 to 6 servings/week | >6 servings/week to 1 serving/day | >1 servings/day  |        |
| No. of cases/person-years in NHS      | 1,500/567,610    | 2,163/659,719         | 1,848/534,085         | 723/213,002                       | 1,367/372,934    |        |
| No. of cases/person-years in NHSII    | 604/403,641      | 870/538,425           | 757/415,130           | 284/177,224                       | 785/419,358      |        |
| Model 2                               | 1                | 0.95 (0.90-1.01)      | 0.93 (0.87-0.99)      | 0.92 (0.85-0.99)                  | 0.93 (0.87-0.99) | 0.03   |
| Model 2 + AHEI                        | 1                | 0.95 (0.90-1.01)      | 0.93 (0.87-0.99)      | 0.92 (0.85-0.99)                  | 0.93 (0.86-0.99) | 0.03   |
| Model 2 + animal fat                  | 1                | 0.95 (0.90-1.01)      | 0.93 (0.87-0.99)      | 0.92 (0.85-0.99)                  | 0.93 (0.87-0.99) | 0.03   |
| Model 2 + fiber                       | 1                | 0.96 (0.90-1.02)      | 0.94 (0.88-1.00)      | 0.94 (0.86-1.01)                  | 0.95 (0.88-1.02) | 0.21   |
| <b>Yellow/orange vegetable intake</b> |                  |                       |                       |                                   |                  |        |
| Amount of intake                      | ≤2 servings/week | >2 to 3 servings/week | >3 to 4 servings/week | >4 to 5 servings/week             | >5 servings/week |        |
| No. of cases/person-years in NHS      | 4,108/1,305,886  | 1,657/470,261         | 931/293,064           | 457/129,100                       | 458/156,630      |        |
| No. of cases/person-years in NHSII    | 1,953/1,188,668  | 631/352,322           | 361/191,770           | 154/104,970                       | 201/116,123      |        |
| Model 2                               | 1                | 0.98 (0.93-1.03)      | 0.95 (0.89-1.01)      | 0.93 (0.85-1.01)                  | 0.91 (0.84-0.99) | 0.004  |
| Model 2 + AHEI                        | 1                | 0.98 (0.93-1.03)      | 0.95 (0.89-1.01)      | 0.92 (0.85-1.01)                  | 0.91 (0.83-0.99) | 0.004  |
| Model 2 + animal fat                  | 1                | 0.98 (0.93-1.03)      | 0.95 (0.89-1.01)      | 0.92 (0.85-1.01)                  | 0.91 (0.83-0.99) | 0.003  |
| Model 2 + fiber                       | 1                | 0.99 (0.94-1.04)      | 0.96 (0.90-1.03)      | 0.95 (0.86-1.03)                  | 0.94 (0.85-1.02) | 0.07   |
| <b>Tomato intake</b>                  |                  |                       |                       |                                   |                  |        |
| Amount of intake                      | ≤2 servings/week | >2 to 4 servings/week | >4 to 6 servings/week | >6 servings/week to 1 serving/day | >1 servings/day  |        |
| No. of cases/person-years in NHS      | 1,675/595,564    | 3,132/950,188         | 1,815/518,863         | 498/157,262                       | 479/128,381      |        |
| No. of cases/person-years in NHSII    | 750/511,096      | 1,197/658,061         | 794/456,451           | 202/115,244                       | 357/212,870      |        |
| Model 2                               | 1                | 1.02 (0.97-1.07)      | 1.03 (0.97-1.09)      | 1.02 (0.93-1.11)                  | 1.06 (0.98-1.15) | 0.21   |
| Model 2 + AHEI                        | 1                | 1.02 (0.97-1.07)      | 1.03 (0.97-1.09)      | 1.02 (0.93-1.11)                  | 1.06 (0.98-1.16) | 0.19   |
| Model 2 + animal fat                  | 1                | 1.02 (0.97-1.07)      | 1.03 (0.97-1.09)      | 1.02 (0.93-1.11)                  | 1.06 (0.98-1.15) | 0.20   |
| Model 2 + fiber                       | 1                | 1.03 (0.98-1.08)      | 1.05 (0.99-1.11)      | 1.04 (0.96-1.14)                  | 1.10 (1.01-1.20) | 0.03   |
| <b>Cruciferous vegetable intake</b>   |                  |                       |                       |                                   |                  |        |
| Amount of intake                      | ≤2 servings/week | >2 to 3 servings/week | >3 to 4 servings/week | >4 to 5 servings/week             | >5 servings/week |        |
| No. of cases/person-years in NHS      | 3,030/1,024,004  | 1,729/476,923         | 1,190/364,159         | 705/192,392                       | 955/297,017      |        |
| No. of cases/person-years in NHSII    | 1,458/880,950    | 681/385,353           | 466/262,993           | 281/161,688                       | 414/262,876      |        |
| Model 2                               | 1                | 0.97 (0.92-1.02)      | 0.92 (0.87-0.98)      | 0.94 (0.87-1.01)                  | 0.90 (0.84-0.96) | 0.0002 |
| Model 2 + AHEI                        | 1                | 0.97 (0.92-1.02)      | 0.92 (0.87-0.97)      | 0.94 (0.87-1.00)                  | 0.89 (0.84-0.95) | 0.0002 |
| Model 2 + animal fat                  | 1                | 0.97 (0.92-1.02)      | 0.92 (0.87-0.98)      | 0.94 (0.87-1.01)                  | 0.90 (0.84-0.95) | 0.0002 |
| Model 2 + fiber                       | 1                | 0.98 (0.93-1.03)      | 0.93 (0.87-0.99)      | 0.95 (0.88-1.02)                  | 0.91 (0.85-0.98) | 0.004  |
| <b>Other vegetable intake</b>         |                  |                       |                       |                                   |                  |        |
| Amount of intake                      | ≤2 servings/week | >2 to 4 servings/week | >4 to 6 servings/week | >6 servings/week to 1 serving/day | >1 servings/day  |        |
| No. of cases/person-years in NHS      | 554/222,662      | 2,183/694,458         | 2,286/681,612         | 912/264,363                       | 1,676/491,969    |        |
| No. of cases/person-years in NHSII    | 251/154,205      | 821/490,953           | 905/504,966           | 320/194,177                       | 1,003/609,606    |        |
| Model 2                               | 1                | 0.99 (0.92-1.07)      | 0.98 (0.90-1.06)      | 0.99 (0.90-1.08)                  | 0.94 (0.86-1.02) | 0.06   |
| Model 2 + AHEI                        | 1                | 0.99 (0.92-1.07)      | 0.98 (0.90-1.06)      | 0.99 (0.90-1.08)                  | 0.94 (0.86-1.02) | 0.06   |
| Model 2 + animal fat                  | 1                | 0.99 (0.91-1.07)      | 0.98 (0.90-1.06)      | 0.99 (0.90-1.08)                  | 0.94 (0.86-1.02) | 0.06   |
| Model 2 + fiber                       | 1                | 1.00 (0.92-1.08)      | 0.99 (0.91-1.08)      | 1.01 (0.91-1.11)                  | 0.97 (0.88-1.06) | 0.39   |

| <b>Fruits and vegetables high in vitamin C</b>  |                   |                        |                        |                                   |                  |        |
|-------------------------------------------------|-------------------|------------------------|------------------------|-----------------------------------|------------------|--------|
| Amount of intake                                | ≤2 servings/week  | >2 to 4 servings/week  | >4 to 6 servings/week  | >6 servings/week to 1 serving/day | >1 servings/day  |        |
| No. of cases/person-years in NHS                | 821/322,755       | 1,787/566,451          | 1,836/548,713          | 825/229,135                       | 2,342/688,031    |        |
| No. of cases/person-years in NHSII              | 444/271,768       | 954/577,239            | 823/468,741            | 286/164,045                       | 793/472,149      |        |
| Model 2                                         | 1                 | 0.94 (0.87-1.00)       | 0.91 (0.85-0.97)       | 0.95 (0.87-1.03)                  | 0.89 (0.82-0.95) | 0.004  |
| Model 2 + AHEI                                  | 1                 | 0.93 (0.87-1.00)       | 0.91 (0.84-0.97)       | 0.95 (0.87-1.03)                  | 0.88 (0.82-0.95) | 0.004  |
| Model 2 + animal fat                            | 1                 | 0.93 (0.87-1.00)       | 0.91 (0.84-0.97)       | 0.95 (0.87-1.03)                  | 0.88 (0.82-0.95) | 0.003  |
| Model 2 + fiber                                 | 1                 | 0.94 (0.87-1.00)       | 0.91 (0.85-0.98)       | 0.96 (0.88-1.05)                  | 0.90 (0.83-0.98) | 0.08   |
| <b>Fruits and vegetables high in α-carotene</b> |                   |                        |                        |                                   |                  |        |
| Amount of intake                                | <2 servings/month | 2 to <4 servings/month | 1 to <2 servings/week  | 2 to <3 servings/week             | ≥3 servings/week |        |
| No. of cases/person-years in NHS                | 665/191,717       | 2,070/649,455          | 2,586/802,189          | 1,123/316,909                     | 1,162/391,617    |        |
| No. of cases/person-years in NHSII              | 451/284,886       | 889/529,046            | 1,033/599,456          | 471/266,650                       | 456/273,655      |        |
| Model 2                                         | 1                 | 0.95 (0.88-1.01)       | 0.92 (0.86-0.99)       | 0.89 (0.82-0.96)                  | 0.91 (0.84-0.99) | 0.02   |
| Model 2 + AHEI                                  | 1                 | 0.95 (0.88-1.01)       | 0.92 (0.86-0.99)       | 0.89 (0.82-0.96)                  | 0.91 (0.84-0.98) | 0.02   |
| Model 2 + animal fat                            | 1                 | 0.95 (0.88-1.01)       | 0.92 (0.86-0.99)       | 0.89 (0.82-0.96)                  | 0.91 (0.84-0.98) | 0.02   |
| Model 2 + fiber                                 | 1                 | 0.95 (0.89-1.02)       | 0.93 (0.87-1.00)       | 0.91 (0.83-0.98)                  | 0.93 (0.86-1.02) | 0.20   |
| <b>Fruits and vegetables high in β-carotene</b> |                   |                        |                        |                                   |                  |        |
| Amount of intake                                | ≤2 servings/week  | >2 to 4 servings/week  | >4 to 6 servings/week  | >6 servings/week to 1 serving/day | >1 servings/day  |        |
| No. of cases/person-years in NHS                | 736/301,972       | 1,381/455,777          | 1,697/508,135          | 851/241,899                       | 2,946/847,277    |        |
| No. of cases/person-years in NHSII              | 249/173,435       | 612/379,126            | 696/414,291            | 324/186,699                       | 1,419/800,339    |        |
| Model 2                                         | 1                 | 0.94 (0.86-1.01)       | 0.90 (0.83-0.98)       | 0.92 (0.84-1.01)                  | 0.87 (0.80-0.94) | 0.0004 |
| Model 2 + AHEI                                  | 1                 | 0.93 (0.86-1.01)       | 0.90 (0.83-0.97)       | 0.92 (0.84-1.00)                  | 0.86 (0.80-0.93) | 0.0003 |
| Model 2 + animal fat                            | 1                 | 0.93 (0.86-1.01)       | 0.90 (0.83-0.97)       | 0.92 (0.84-1.00)                  | 0.87 (0.80-0.94) | 0.0003 |
| Model 2 + fiber                                 | 1                 | 0.93 (0.86-1.01)       | 0.90 (0.83-0.98)       | 0.92 (0.84-1.01)                  | 0.88 (0.81-0.96) | 0.008  |
| <b>Fruits and vegetables high in lutein</b>     |                   |                        |                        |                                   |                  |        |
| Amount of intake                                | ≤1 serving/month  | >1 to 3 servings/month | >3 to 4 servings/month | >1 to 3 servings/week             | >3 servings/week |        |
| No. of cases/person-years in NHS                | 797/254,275       | 1,944/581,492          | 1,410/457,320          | 2,820/820,986                     | 630/233,258      |        |
| No. of cases/person-years in NHSII              | 861/565,092       | 1,084/622,253          | 492/299,831            | 723/389,612                       | 140/76,717       |        |
| Model 2                                         | 1                 | 1.01 (0.95-1.07)       | 1.00 (0.93-1.07)       | 0.97 (0.92-1.04)                  | 0.94 (0.86-1.03) | 0.07   |
| Model 2 + AHEI                                  | 1                 | 1.01 (0.95-1.07)       | 1.00 (0.93-1.07)       | 0.97 (0.91-1.04)                  | 0.94 (0.86-1.03) | 0.07   |
| Model 2 + animal fat                            | 1                 | 1.01 (0.95-1.07)       | 1.00 (0.93-1.07)       | 0.97 (0.91-1.04)                  | 0.94 (0.86-1.03) | 0.07   |
| Model 2 + fiber                                 | 1                 | 1.01 (0.95-1.08)       | 1.01 (0.94-1.08)       | 0.99 (0.93-1.06)                  | 0.97 (0.88-1.06) | 0.33   |

Model 2 stratified by cohort, calendar year, and age in months and adjusted for family history of breast cancer (yes, no), history of benign breast disease (yes, no), height (<1.60, 1.60 to <1.65, 1.65 to <1.70, 1.70 to <1.75, and ≥1.75 meters), BMI at age 18 years (<18.5, 18.5 to <20, 20 to <22.5, 22.5 to <25, 25.0 to <30, ≥30.0 kg/m<sup>2</sup>), weight change since age 18 years (continuous), smoking (never, past, current 1-14/day, current 15-24/day, current ≥25/day), physical activity (quintiles of MET-hr per week, missing), oral contraceptive use (never, < 2 years, 2 to <5 years, 5 to <10 years, ≥10 years), alcohol intake (g/day, quintiles), total energy intake (kcal/day, quintiles), age at menarche (<12, 12, 13, 14, >14 years), parity and age at first birth (nulliparous, parity ≤2 and age at first birth <25 years, parity ≤2 and age at first birth 25 to <30 years, parity ≤2 and age at first birth ≥30 years, parity 3 to 4 and age at first birth <25 years, parity 3 to 4 and age at first birth 25 to <30 years, parity 3 to 4 and age at first birth ≥30 years, parity ≥5 and age at first birth <25 years, parity ≥5 and age at first birth ≥25 years), and menopausal status, age at menopause, and postmenopausal hormone use (premenopausal, postmenopausal and age at menopause <50 years and never postmenopausal hormone use, postmenopausal and age at menopause <50 years and past postmenopausal hormone use, postmenopausal and age at menopause <50 years and current postmenopausal hormone use, postmenopausal and age at menopause ≥50 years and never postmenopausal hormone use, postmenopausal and age at menopause ≥50 years and past postmenopausal hormone use, postmenopausal and age at menopause ≥50 years and current postmenopausal hormone use, missing).

**Table S6: Hazard ratios and 95% confidence intervals of fruit and vegetable consumption in relation to incident invasive breast cancer among women in the Nurses' Health Study and Nurses' Health Study II separately.**

|                                         |                   | Consumption Levels       |                                      |                          |                   |      | <i>P</i> <sub>trend</sub> | <i>P</i> <sub>heterogeneity</sub> |
|-----------------------------------------|-------------------|--------------------------|--------------------------------------|--------------------------|-------------------|------|---------------------------|-----------------------------------|
| <b>Total fruit and vegetable intake</b> |                   |                          |                                      |                          |                   |      |                           |                                   |
| Amount of intake                        | ≤2.5 servings/day | >2.5 to 3.5 servings/day | >3.5 to 4.5 servings/day             | >4.5 to 5.5 servings/day | >5.5 servings/day |      |                           |                                   |
| The Nurses' Health Study                |                   |                          |                                      |                          |                   |      |                           |                                   |
| No. of cases/person-years in NHS        | 1,292/457,076     | 1,683/542,469            | 1,768/525,605                        | 1,324/376,169            | 1,544/453,806     |      |                           |                                   |
| Model 1                                 | 1                 | 0.98 (0.91-1.05)         | 1.00 (0.93-1.08)                     | 1.01 (0.93-1.09)         | 0.96 (0.89-1.03)  | 0.38 |                           |                                   |
| Model 2                                 | 1                 | 0.94 (0.88-1.02)         | 0.96 (0.89-1.03)                     | 0.96 (0.88-1.04)         | 0.90 (0.83-0.98)  | 0.05 |                           |                                   |
| The Nurses' Health Study II             |                   |                          |                                      |                          |                   |      |                           |                                   |
| No. of cases/person-years in NHSII      | 722/450,298       | 761/452,651              | 693/405,921                          | 516/281,609              | 608/363,466       |      |                           |                                   |
| Model 1                                 | 1                 | 0.97 (0.87-1.07)         | 0.95 (0.86-1.06)                     | 0.99 (0.89-1.11)         | 0.91 (0.81-1.01)  | 0.13 |                           |                                   |
| Model 2                                 | 1                 | 0.93 (0.84-1.03)         | 0.91 (0.81-1.01)                     | 0.94 (0.83-1.06)         | 0.87 (0.77-0.98)  | 0.05 | 0.56                      |                                   |
| <b>Total fruit intake</b>               |                   |                          |                                      |                          |                   |      |                           |                                   |
| Amount of intake                        | ≤4 servings/week  | >4 to 6 servings/week    | >6 servings/week to 1.5 servings/day | >1.5 to 2.5 servings/day | >2.5 servings/day |      |                           |                                   |
| The Nurses' Health Study                |                   |                          |                                      |                          |                   |      |                           |                                   |
| No. of cases/person-years in NHS        | 1,023/365,517     | 963/298,599              | 2,311/718,399                        | 2,400/682,790            | 914/289,822       |      |                           |                                   |
| Model 1                                 | 1                 | 1.05 (0.96-1.14)         | 0.99 (0.92-1.07)                     | 1.04 (0.97-1.12)         | 0.94 (0.86-1.03)  | 0.27 |                           |                                   |
| Model 2                                 | 1                 | 1.03 (0.94-1.12)         | 0.97 (0.90-1.05)                     | 1.03 (0.95-1.12)         | 0.95 (0.86-1.05)  | 0.49 |                           |                                   |
| The Nurses' Health Study II             |                   |                          |                                      |                          |                   |      |                           |                                   |
| No. of cases/person-years in NHSII      | 802/497,615       | 583/337,772              | 1,061/612,398                        | 677/391,529              | 177/114,632       |      |                           |                                   |
| Model 1                                 | 1                 | 0.99 (0.89-1.11)         | 0.97 (0.88-1.06)                     | 0.95 (0.85-1.05)         | 0.86 (0.73-1.01)  | 0.05 |                           |                                   |
| Model 2                                 | 1                 | 0.97 (0.87-1.08)         | 0.93 (0.84-1.02)                     | 0.91 (0.81-1.01)         | 0.84 (0.71-1.00)  | 0.02 | 0.18                      |                                   |
| <b>Total vegetable intake</b>           |                   |                          |                                      |                          |                   |      |                           |                                   |
| Amount of intake                        | ≤1.5 servings/day | >1.5 to 2.5 servings/day | >2.5 to 3.5 servings/day             | >3.5 to 4.5 servings/day | >4.5 servings/day |      |                           |                                   |
| The Nurses' Health Study                |                   |                          |                                      |                          |                   |      |                           |                                   |
| No. of cases/person-years in NHS        | 1,155/421,021     | 2,547/815,680            | 2,282/651,837                        | 1,034/299,308            | 593/167,280       |      |                           |                                   |
| Model 1                                 | 1                 | 0.98 (0.91-1.05)         | 1.03 (0.95-1.10)                     | 0.98 (0.89-1.06)         | 1.00 (0.90-1.10)  | 0.91 |                           |                                   |
| Model 2                                 | 1                 | 0.93 (0.86-1.00)         | 0.95 (0.88-1.03)                     | 0.90 (0.82-0.98)         | 0.91 (0.82-1.01)  | 0.10 |                           |                                   |
| The Nurses' Health Study II             |                   |                          |                                      |                          |                   |      |                           |                                   |
| No. of cases/person-years in NHSII      | 483/308,753       | 1,034/610,319            | 898/518,716                          | 487/287,107              | 398/229,049       |      |                           |                                   |
| Model 1                                 | 1                 | 0.99 (0.89-1.10)         | 0.96 (0.86-1.08)                     | 0.92 (0.81-1.05)         | 0.95 (0.83-1.09)  | 0.25 |                           |                                   |
| Model 2                                 | 1                 | 0.94 (0.84-1.05)         | 0.91 (0.80-1.02)                     | 0.87 (0.76-1.00)         | 0.92 (0.79-1.07)  | 0.18 | 0.69                      |                                   |

Model 1 stratified by calendar year, and age in months.

Model 2 stratified by calendar year and age in months and adjusted for family history of breast cancer (yes, no), history of benign breast disease (yes, no), height (<1.60, 1.60 to <1.65, 1.65 to <1.70, 1.70 to <1.75, and ≥1.75 meters), BMI at age 18 years (<18.5, 18.5 to <20, 20 to <22.5, 22.5 to <25, 25.0 to <30, ≥30.0 kg/m<sup>2</sup>), weight change since age 18 years (continuous), smoking (never, past, current 1 to 14/day, current 15 to 24/day, current ≥25/day), physical activity (quintiles of MET-hr per week, missing), oral contraceptive use (never, < 2 years, 2 to <5 years, 5 to <10 years, ≥10 years), alcohol intake (g/day, quintiles), total energy intake (kcal/day, quintiles), age at menarche (<12, 12, 13, 14, >14 years), parity and age at first birth (nulliparous, parity ≤2 and age at first birth <25 years, parity ≤2 and age at first birth 25 to <30 years, parity ≤2 and age at first birth ≥30 years, parity 3 to 4 and age at first birth <25 years, parity 3 to 4 and age at first birth 25 to <30 years, parity 3 to 4 and age at first birth ≥30 years,

parity  $\geq 5$  and age at first birth  $< 25$  years, parity  $\geq 5$  and age at first birth  $\geq 25$  years), and menopausal status, age at menopause, and postmenopausal hormone use (premenopausal, postmenopausal and age at menopause  $< 50$  years and never postmenopausal hormone use, postmenopausal and age at menopause  $< 50$  years and past postmenopausal hormone use, postmenopausal and age at menopause  $< 50$  years and current postmenopausal hormone use, postmenopausal and age at menopause  $\geq 50$  years and never postmenopausal hormone use, postmenopausal and age at menopause  $\geq 50$  years and past postmenopausal hormone use, postmenopausal and age at menopause  $\geq 50$  years and current postmenopausal hormone use, missing).
